# Supplementary material
Source: publisher site journal article supplement (https://www.dovepress.com/article/290796)
Supplement: Supplementary file 1 [file get_supplementary_file.php]

**Supporting Information**

**Nanosonosensitizer-augmented sonodynamic therapy combined with checkpoint blockade for cancer immunotherapy**

Xiaoning Lin1‡, Rong Huang3‡, Yanlin Huang1‡,Kai Wang4,Heng Li1, Yiheng Bao1, Chaohui Wu5, Yi Zhang6, Xinhua Tian1*, Xiaomin Wang2*

1 Department of Neurosurgery, Zhongshan Hospital Xiamen University, Xiamen, 361004, China.

2 Fujian Provincial Key Laboratory of Chronic Liver Disease and Hepatocellular Carcinoma, Xiamen University Affiliated Zhongshan Hospital, Xiamen 361004, China.

3 Department of Child Health, Women and Children's Hospital, Xiamen University, Xiamen, 361003, China.

4 School of Public Health, Xiamen University, Xiamen 361102, China.

5 Department of Thoracic Surgery, Zhongshan Hospital Xiamen University, Xiamen, 361004, China.

6 Department of Breast Surgery, Xiamen TCM Hospital, Xiamen, 361001, China.


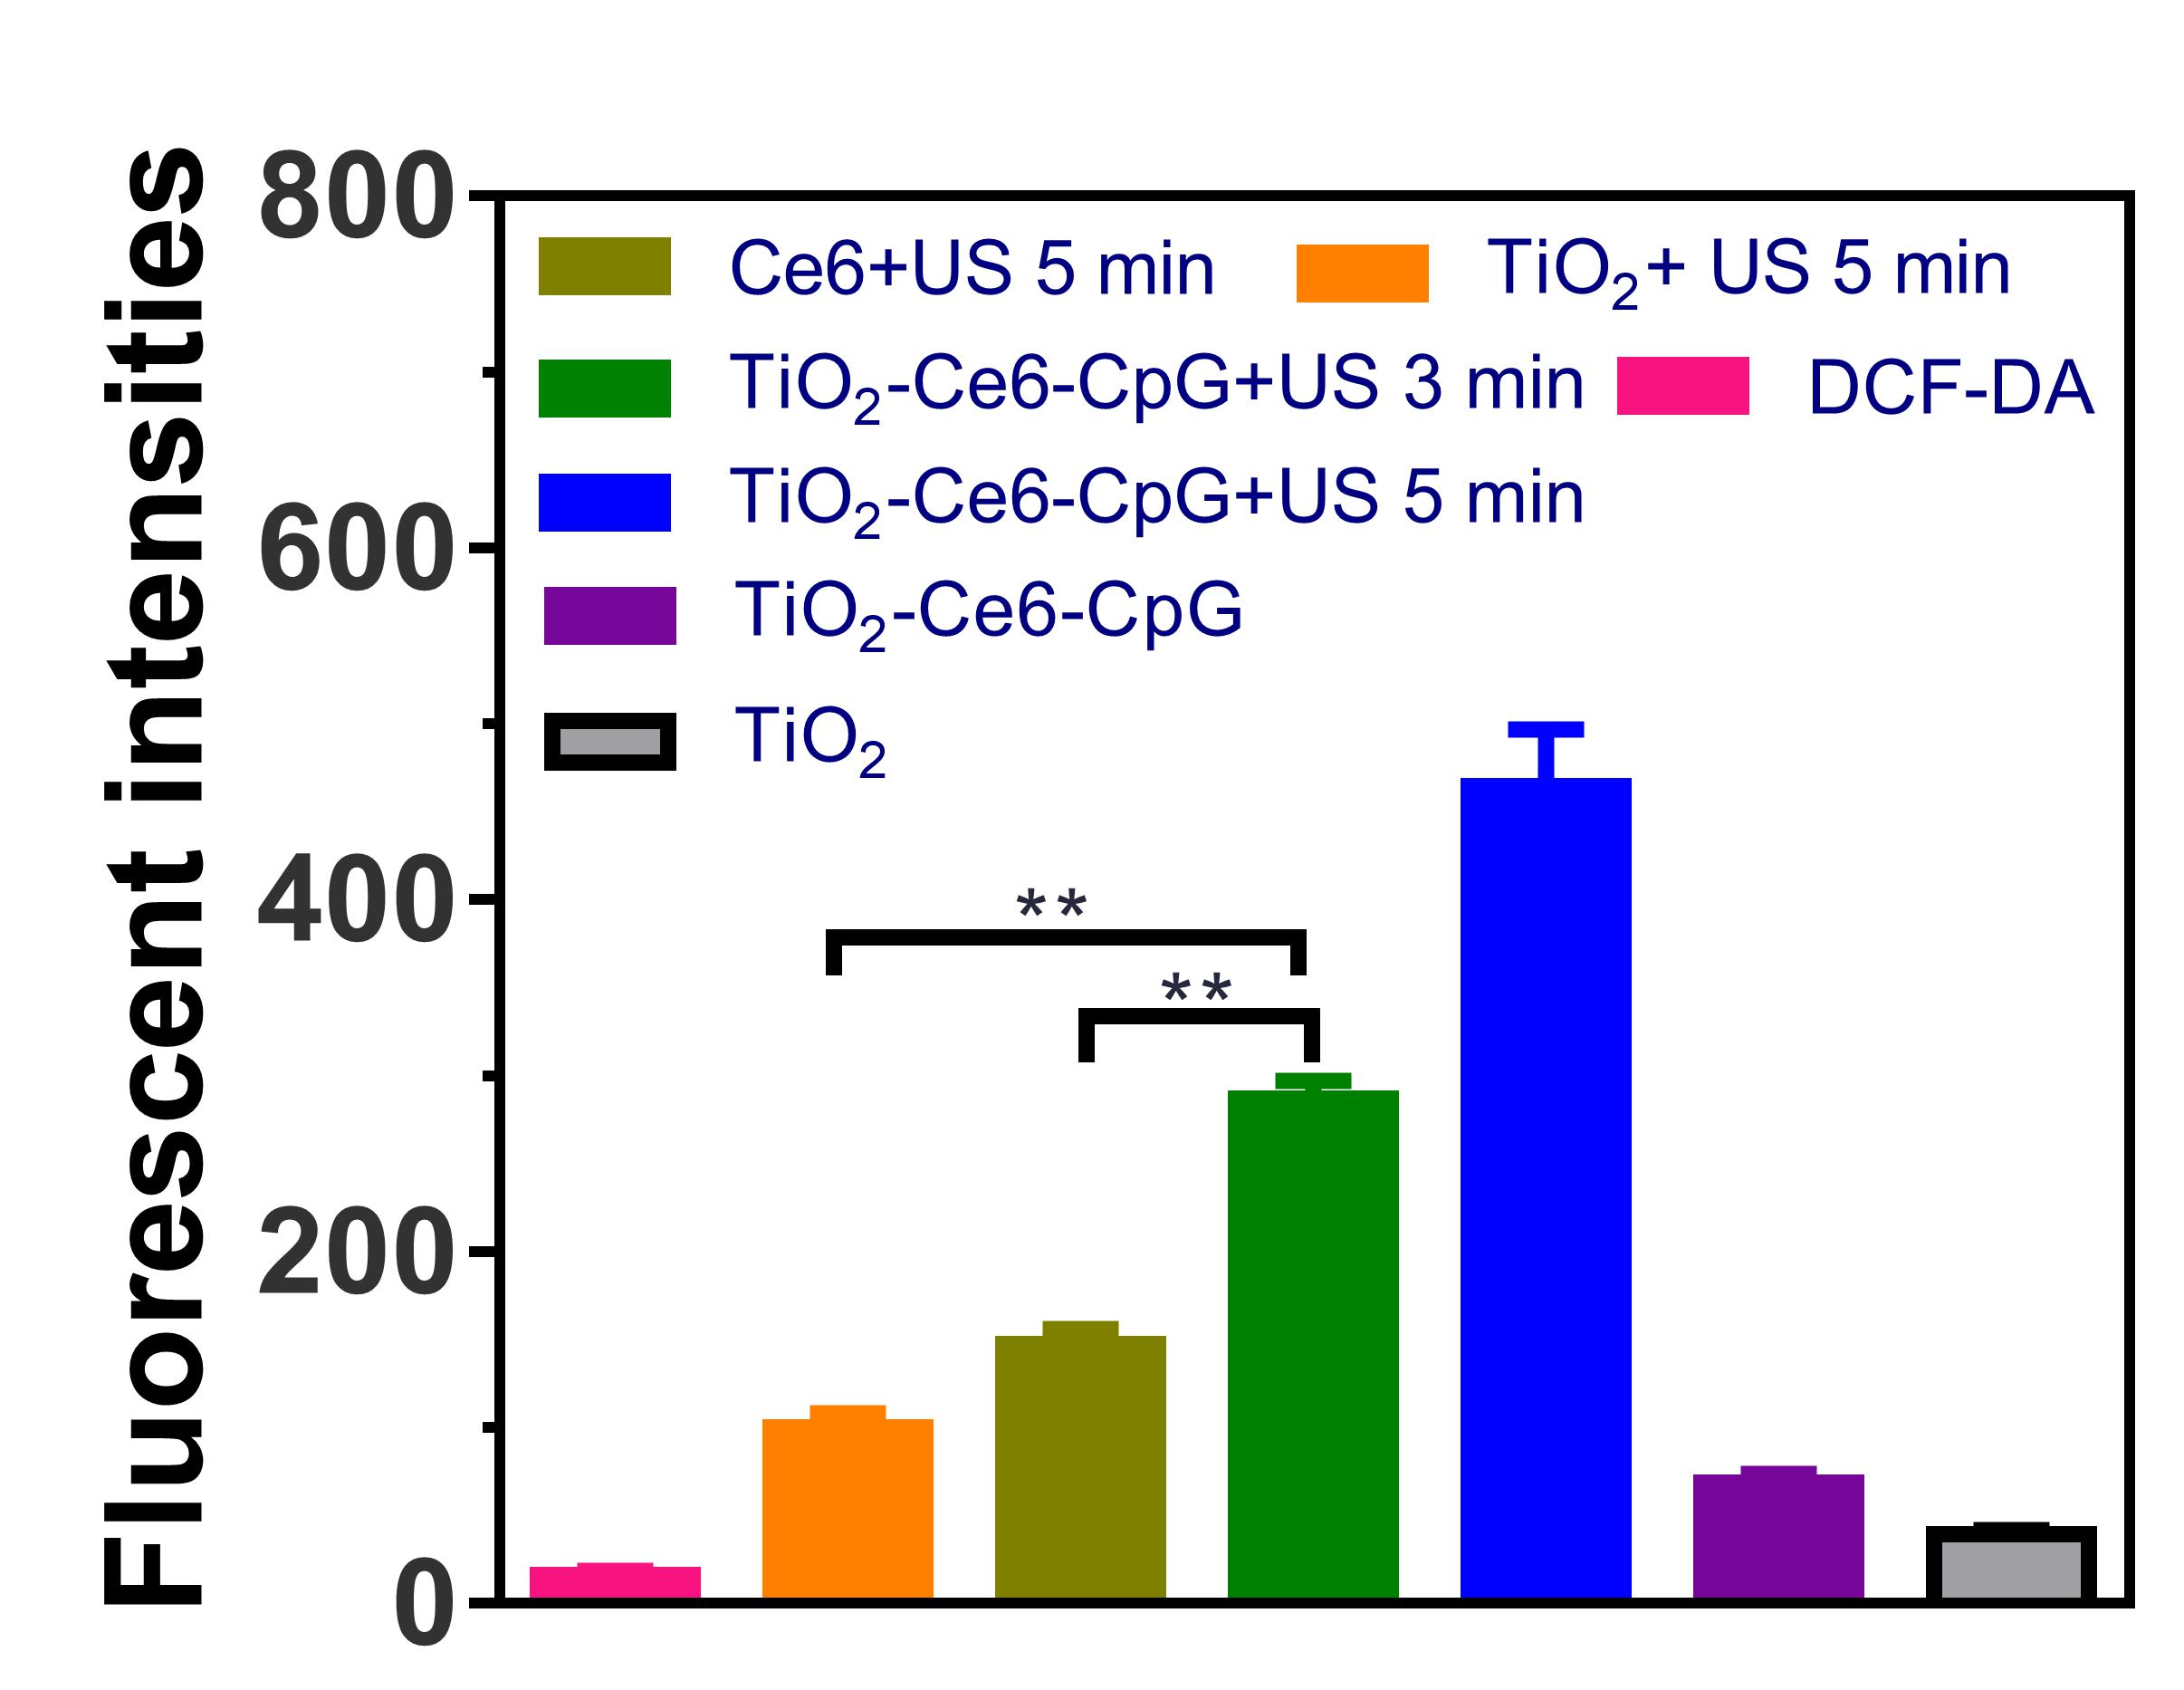


Figure S1. The fluorescent intensities of DCF-DA in hepa1-6 cells after various treatments analyzed by CLSM. Data are expressed as means ± SD (n = 3). ***P* < 0.01.


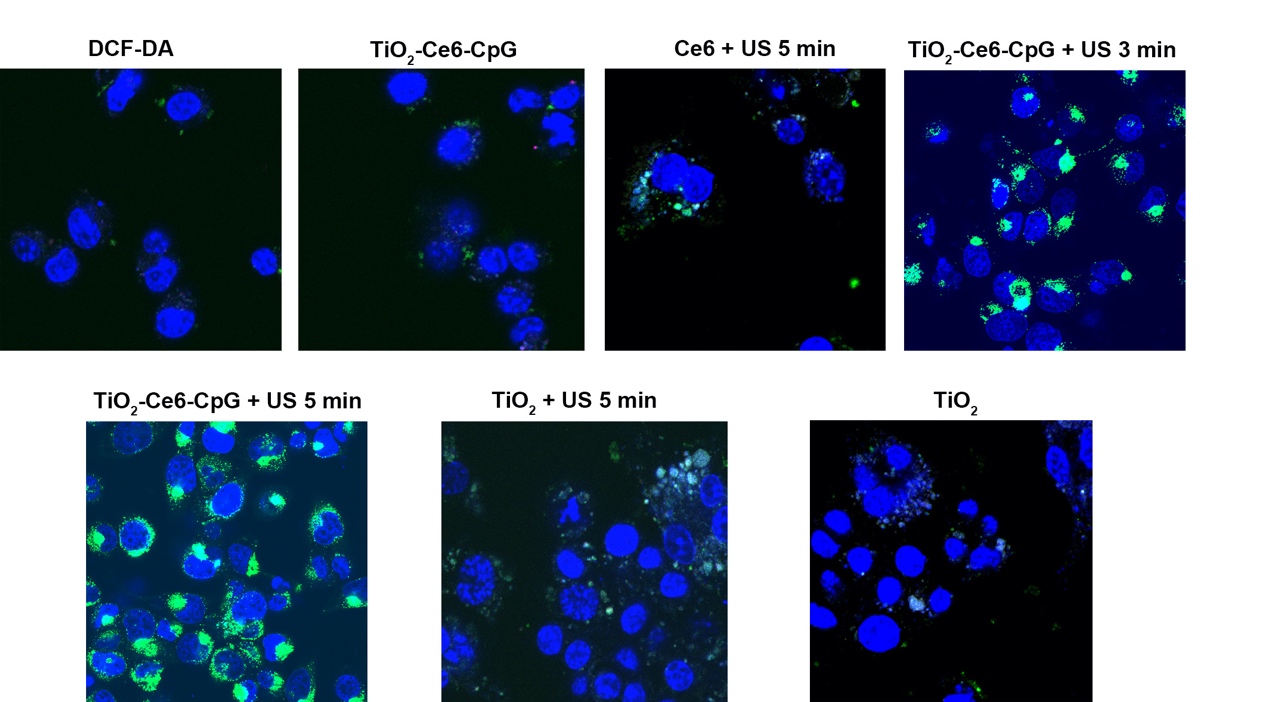


Figure S2. The confocal images of ROS generated in hepa1-6 cells after various treatment.


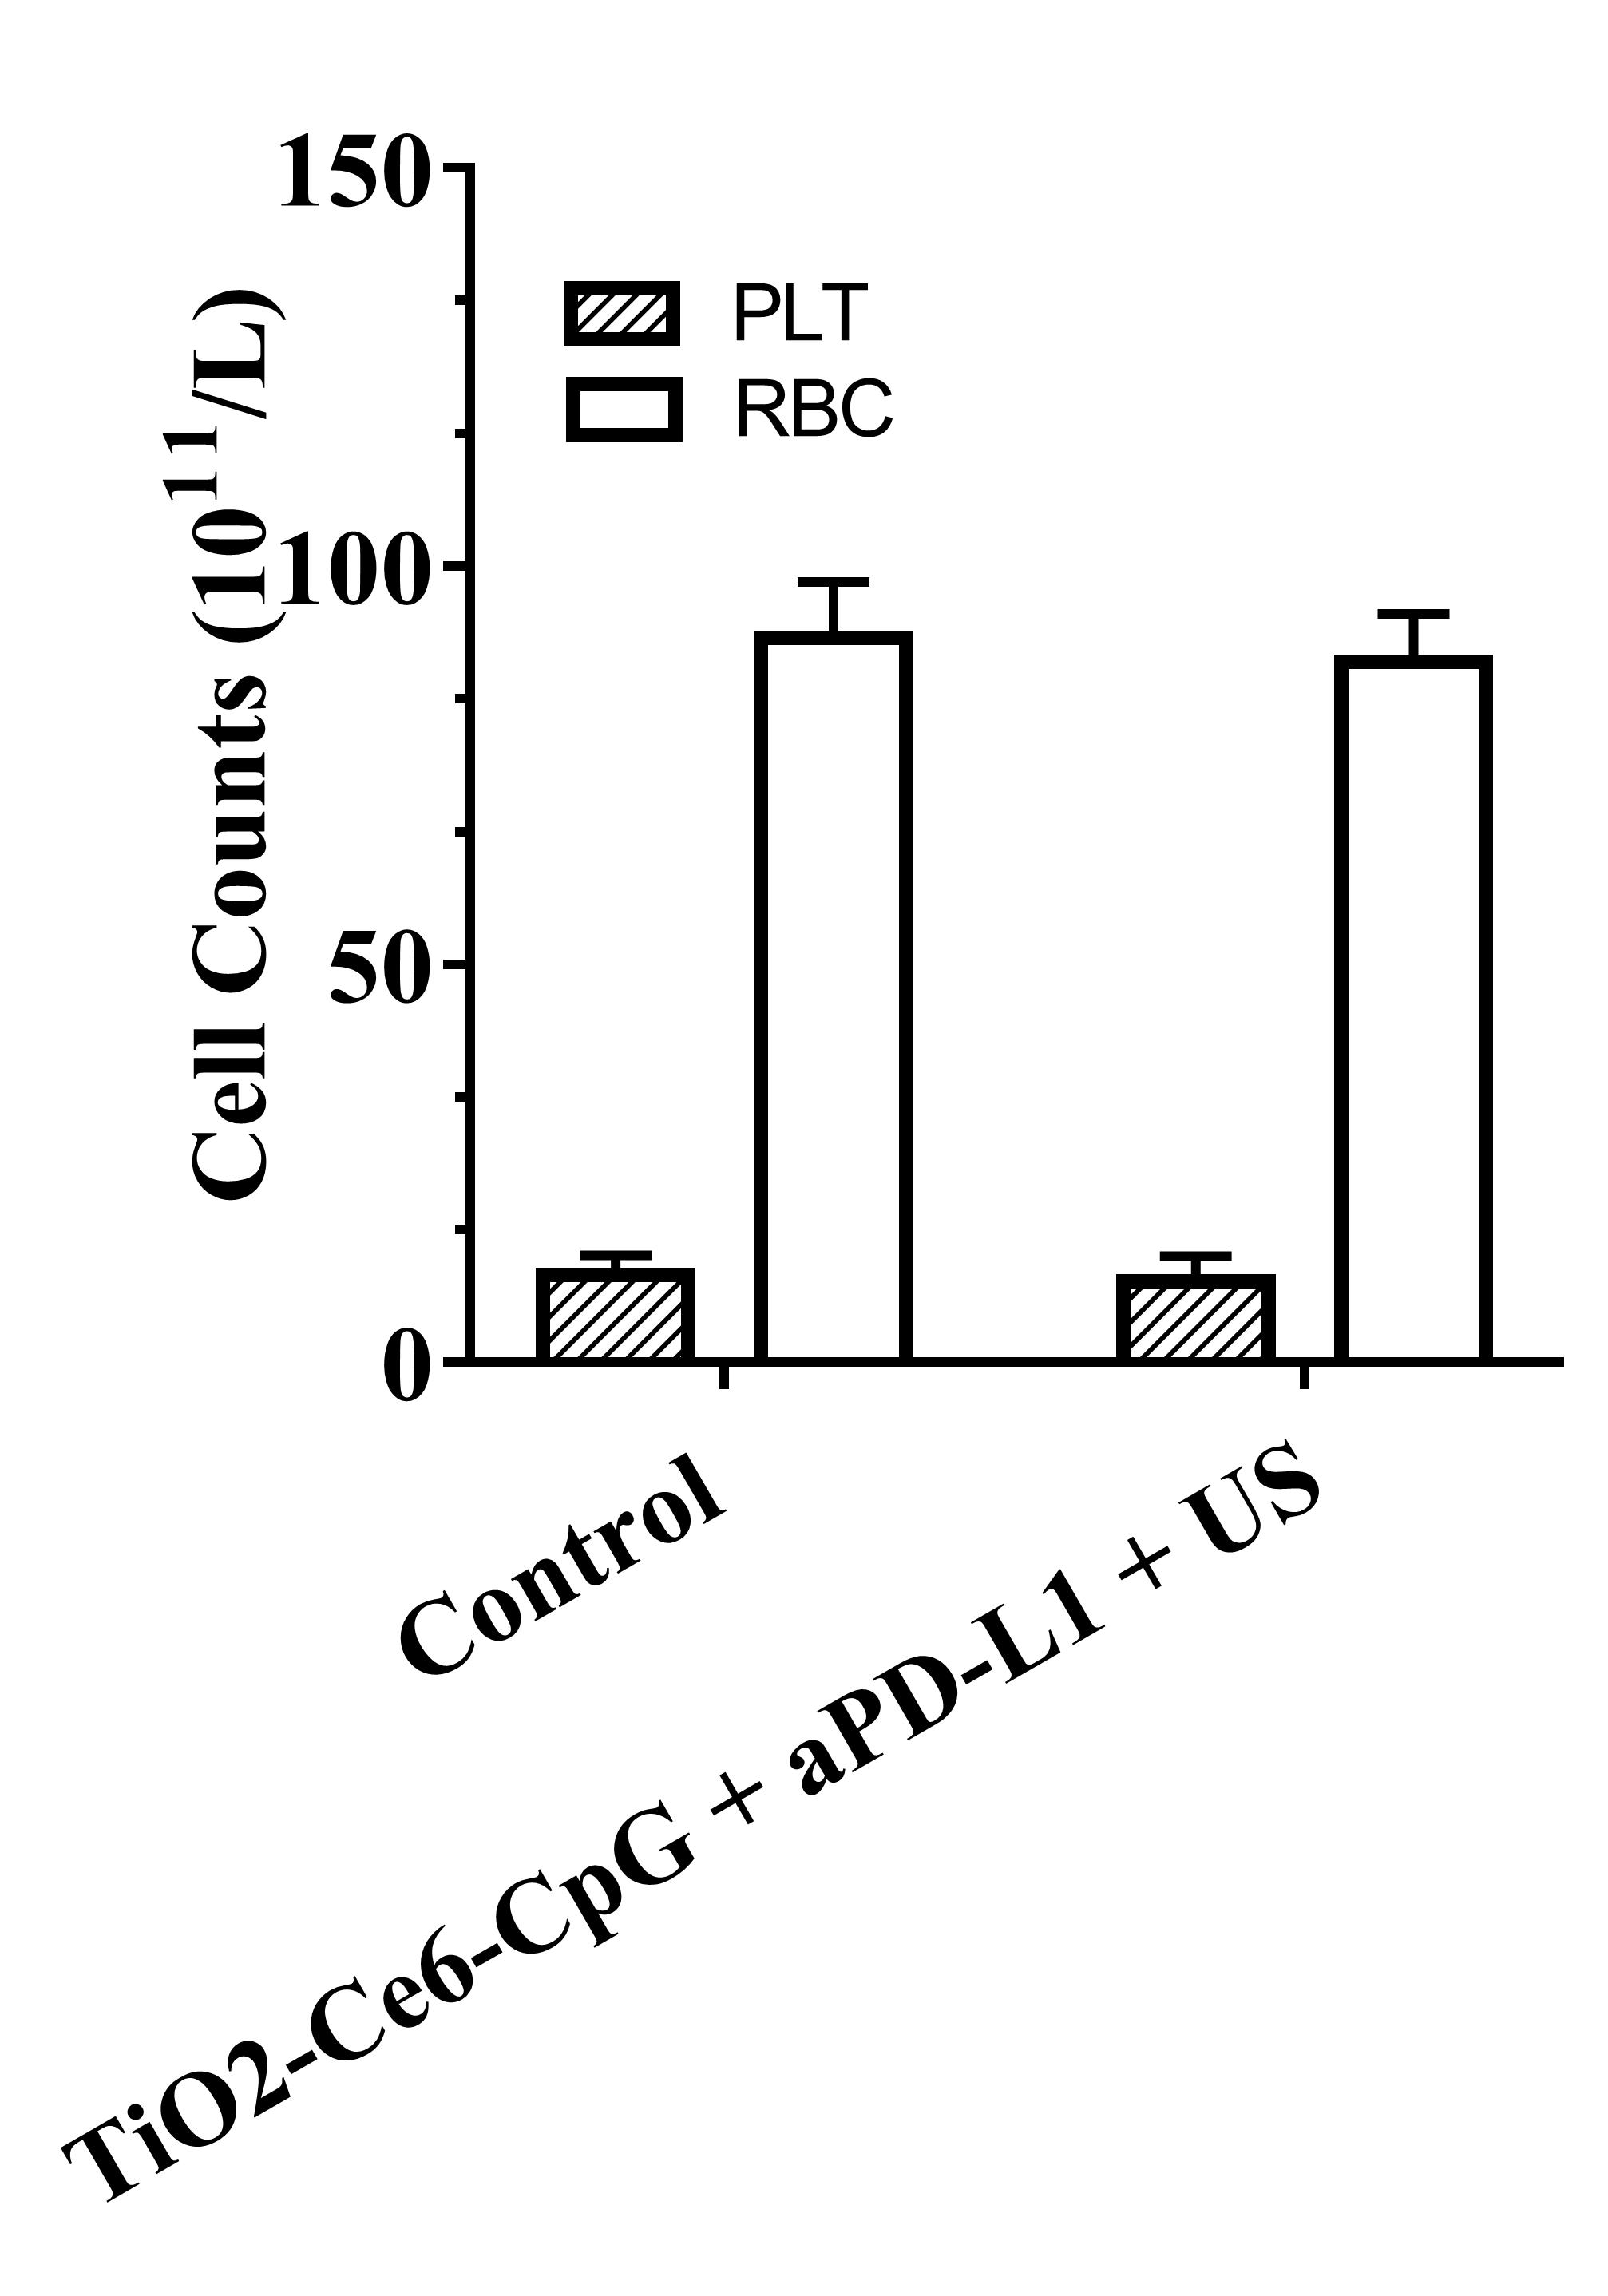


Figure S3. Blood routine test after treatments in tumor-bearing mice. The control group was untreated healthy mice. Blood routine data including red blood cell (RBC) and platelets (PLT) were measured. Data are expressed as means ± SD (n = 3).


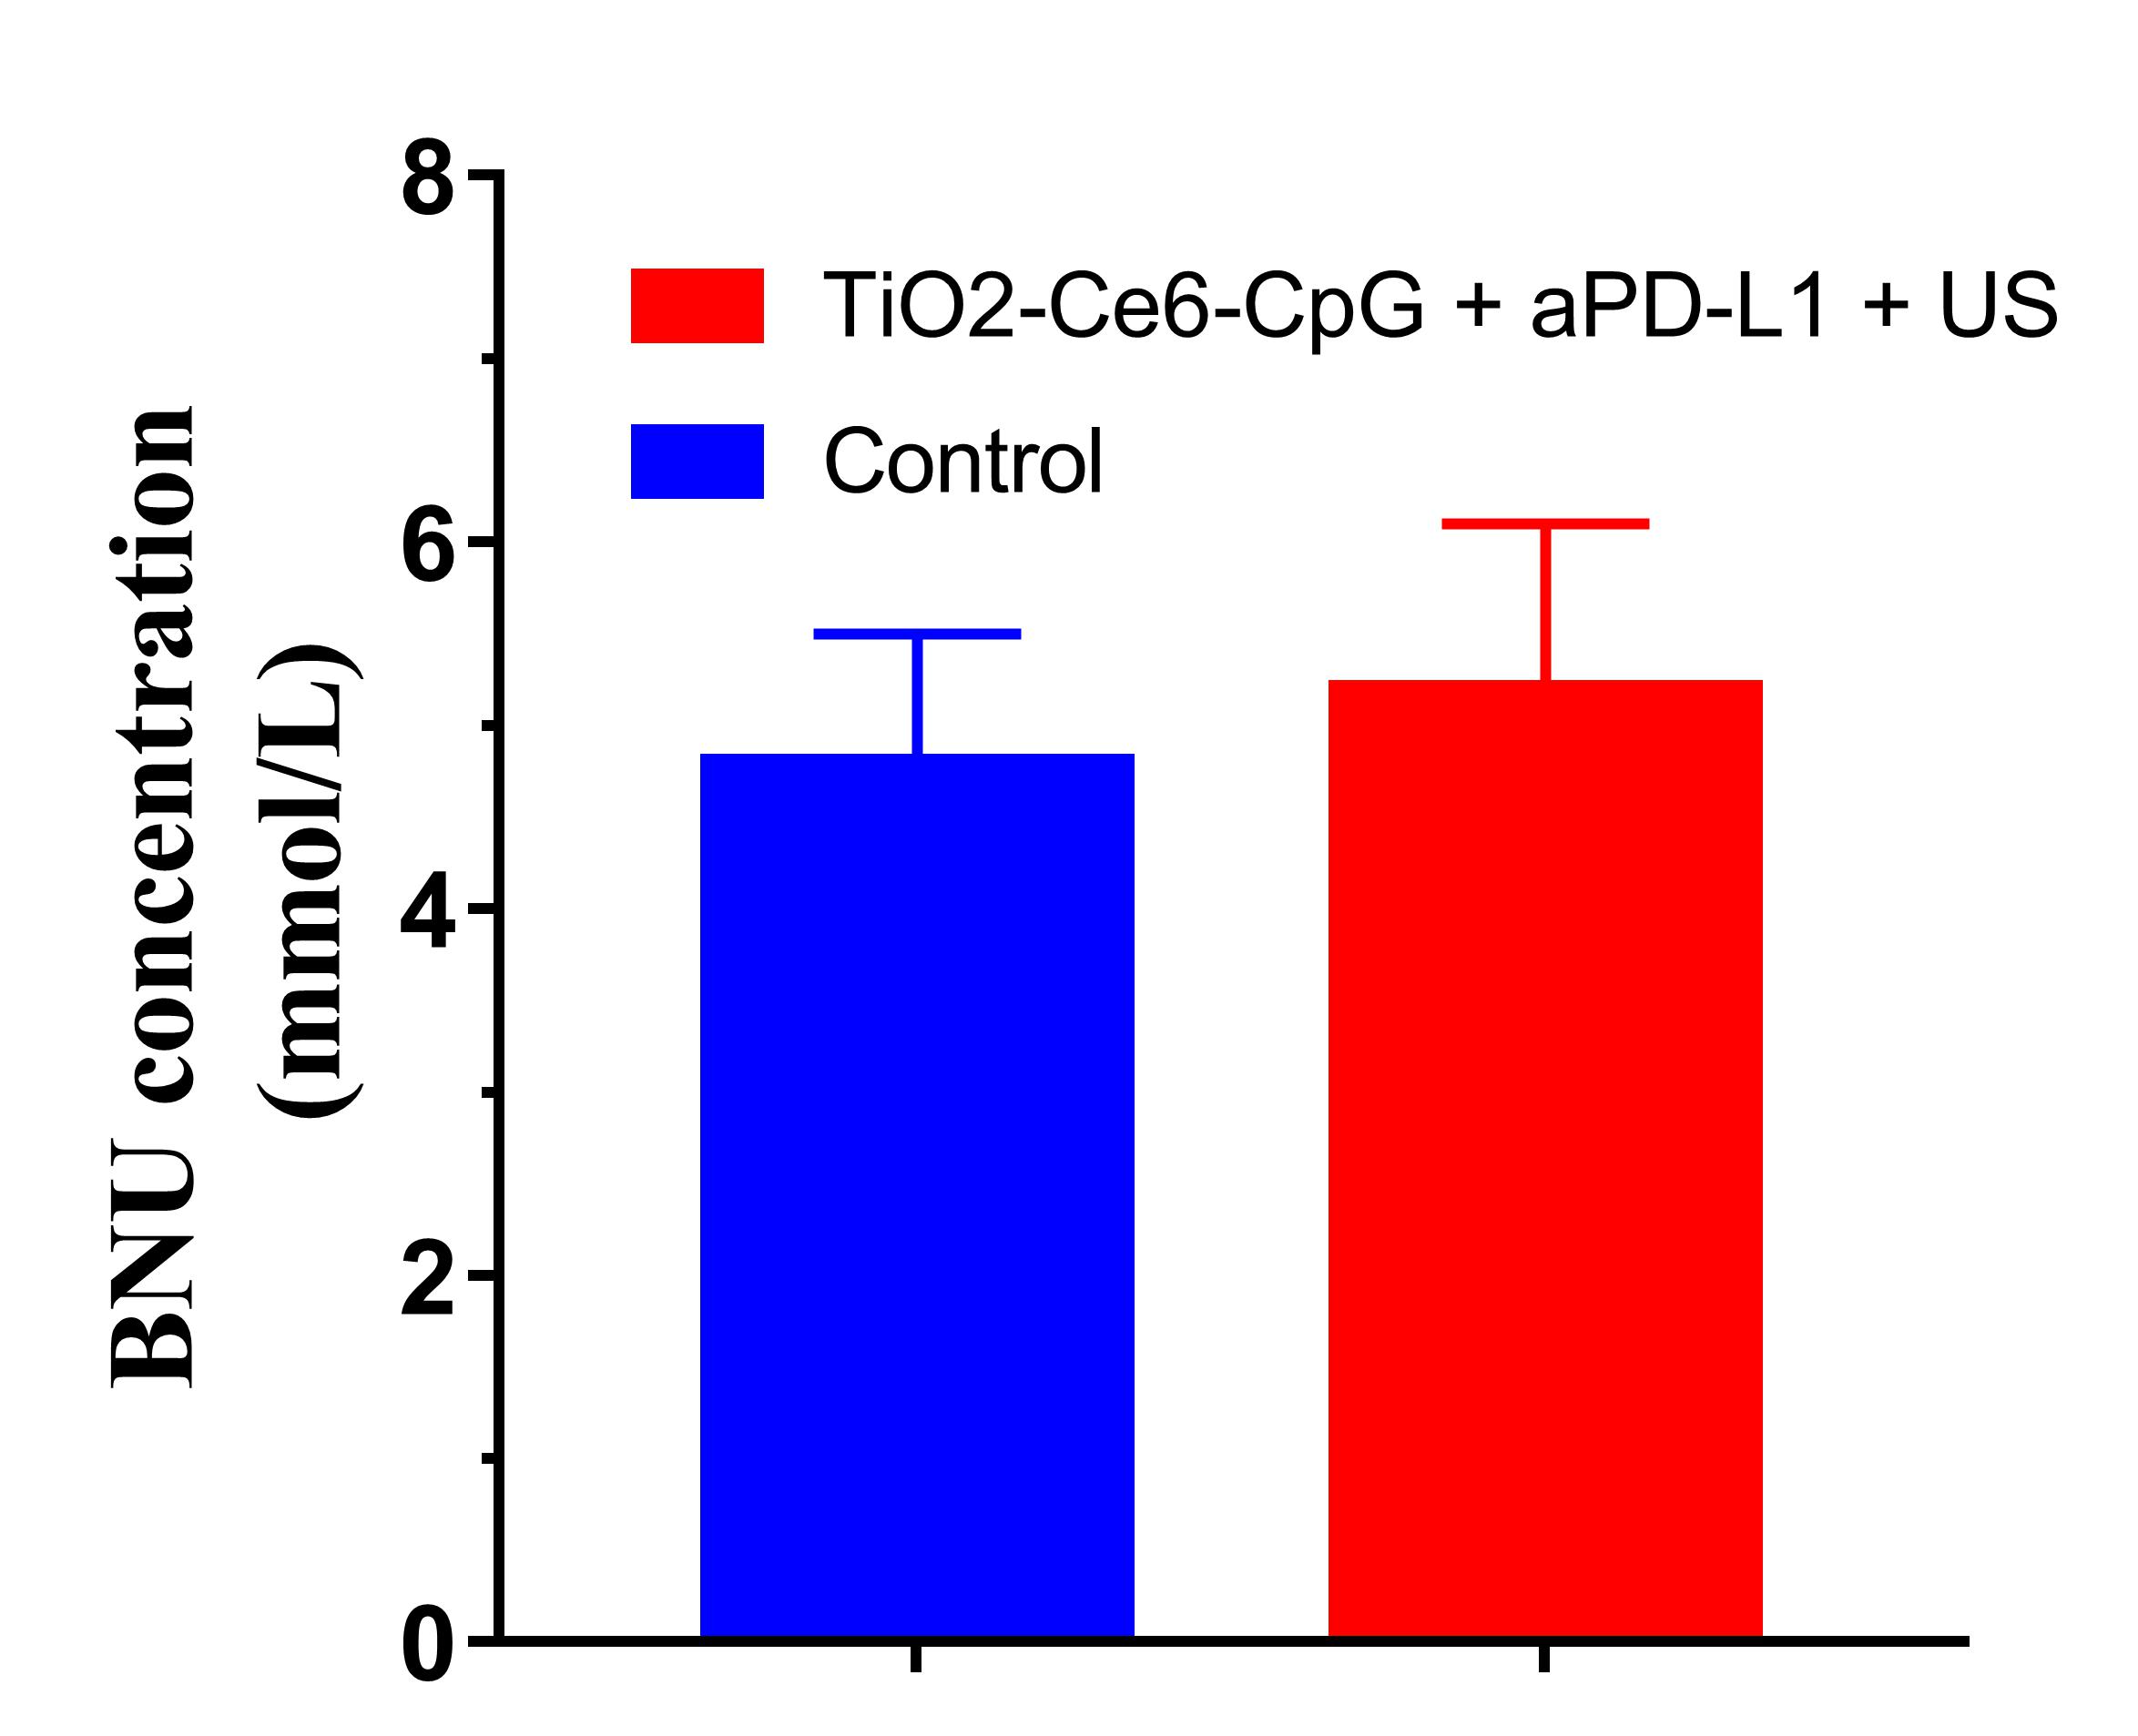


Figure S4. Analysis of blood urea nitrogen (BUN) after treatments in tumor-bearing mice. The control group was untreated healthy mice. Data are expressed as means ± SD (n = 3).


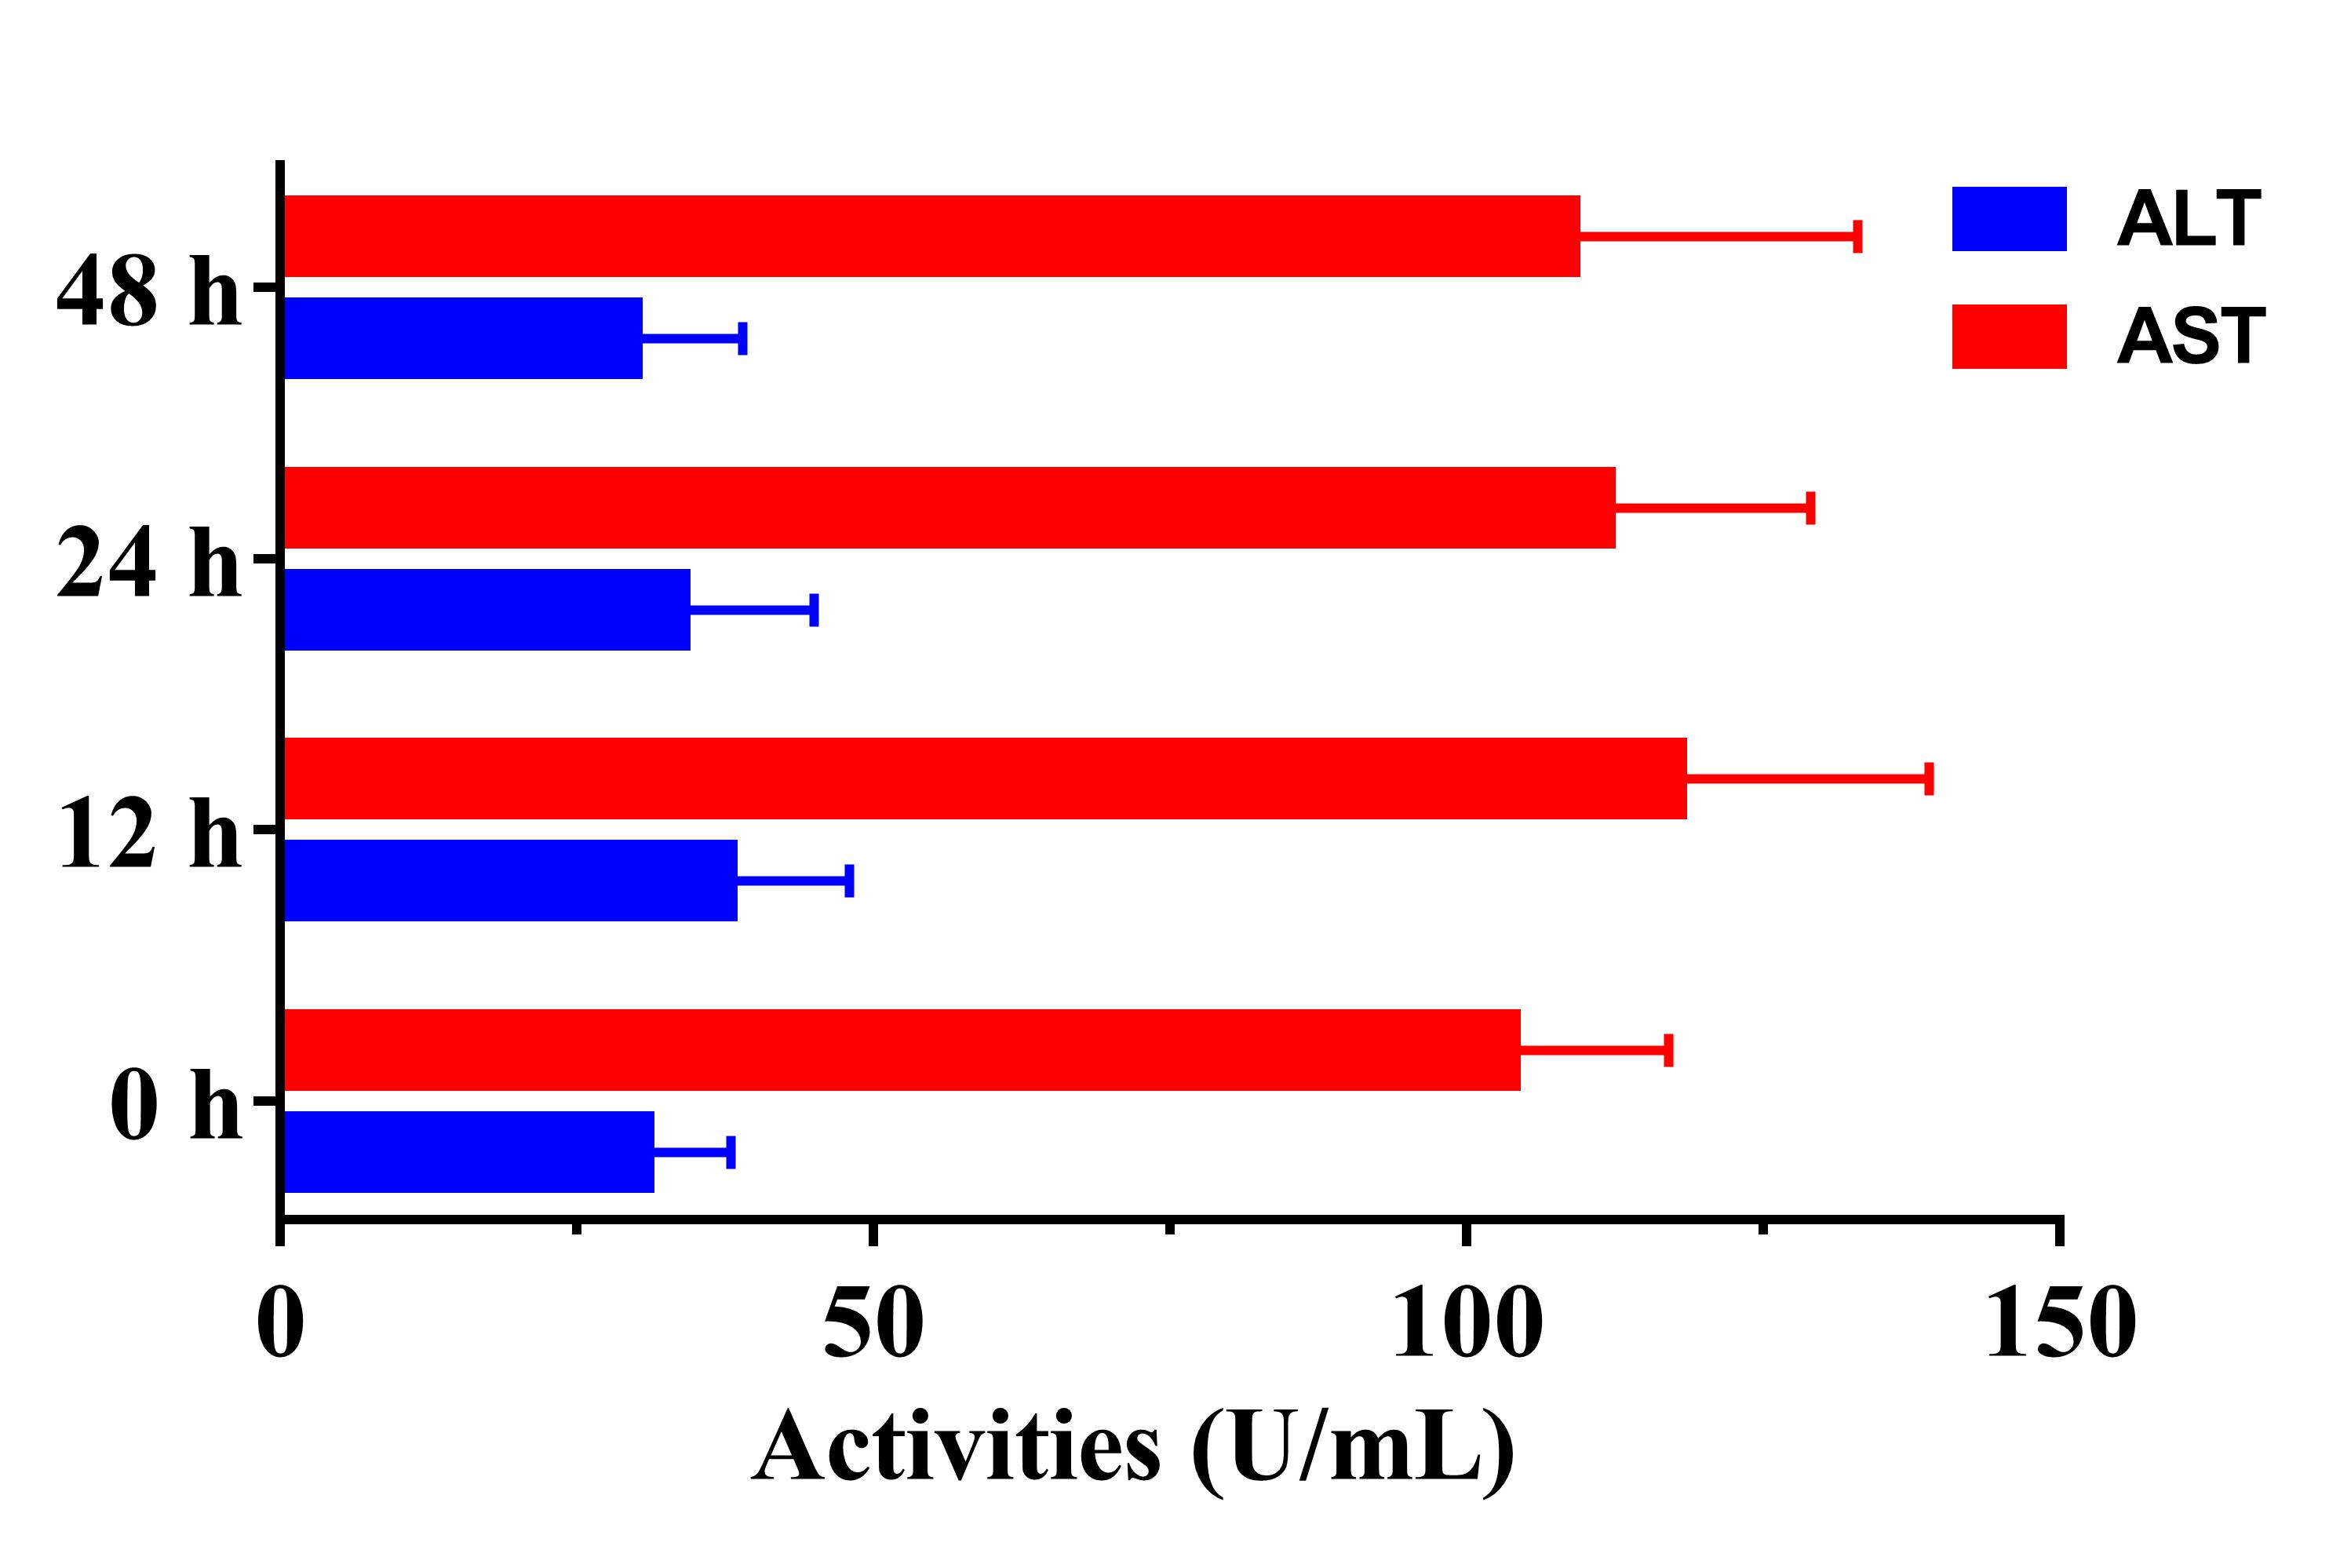


Figure S5. Analysis of liver function after treatments in tumor-bearing mice at different times. Data are expressed as means ± SD (n = 3). ALT, alanine aminotransferase. AST, aspartate aminotransferase.


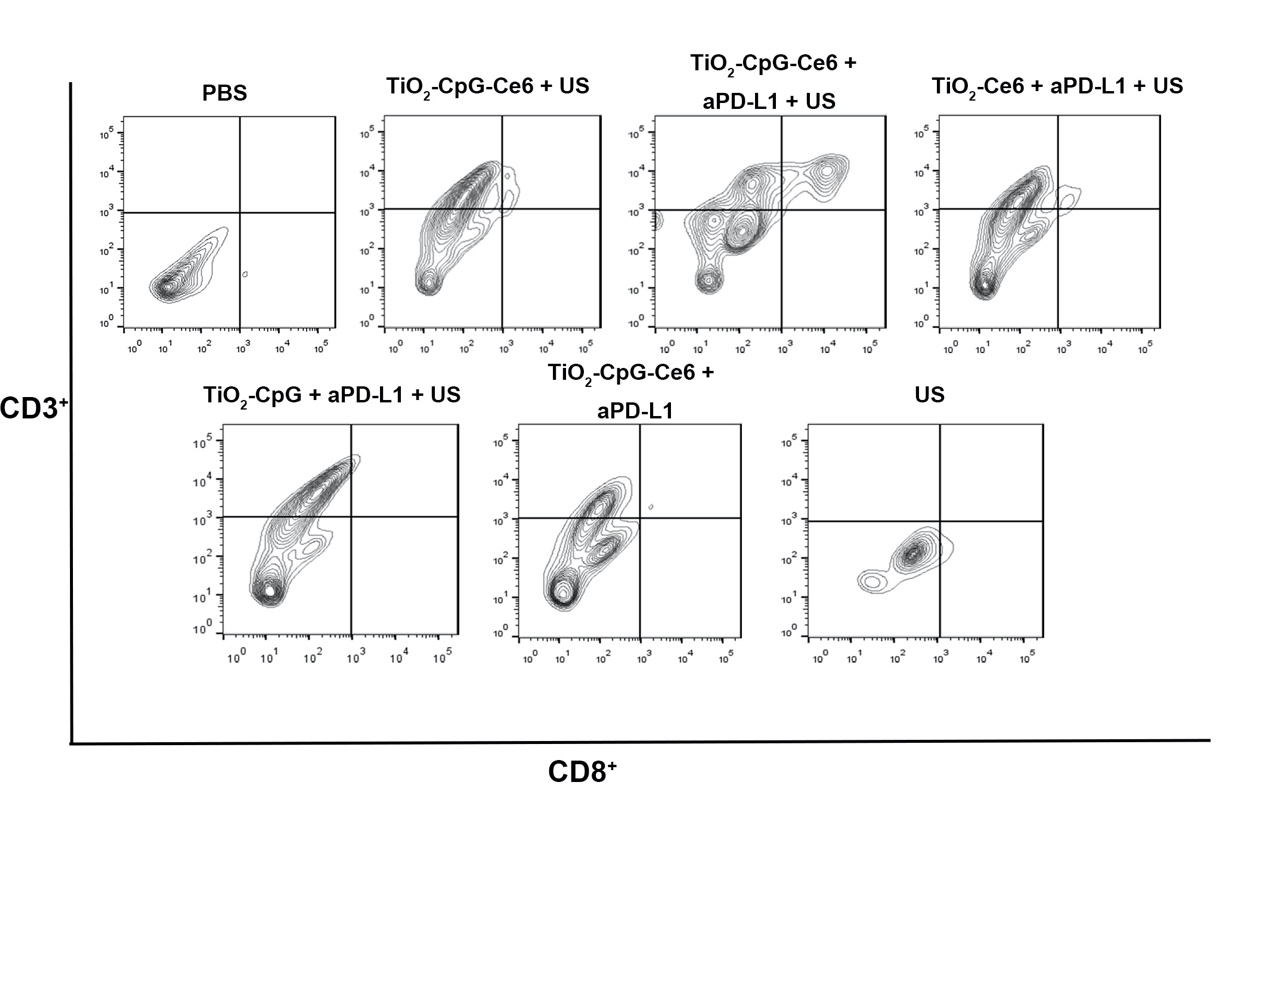


Figure S6: Flow cytometric detection of CD8+ T cells in the secondary tumors.
